# Supplementary material for: Is It Possible to Notice the Unmet Non-Medical Needs among Cancer Patients? Application of the Needs Evaluation Questionnaire in Men with Lung Cancer
Source: MDPI journal article supplement (doi:10.3390/curroncol30030264), 2023-03-20
Supplement: s1 [file s1]

Table S1. The correlations between unmet non-medical needs and demographic's factors.
